# Supplementary material
Source: Royal Society of Chemistry journal article supplement (https://www.rsc.org/suppdata/dt/1999/2751/809866b.doc)
Supplement: Supplementary file 1 [file 809866b.doc]

**Supplementary Table I**. Obtained kobs1 and kobs2 at Different [**L**2FeII]a

| [**L2**FeII]x104, M | kobs1, s-1 | kobs2, s-1 |
| --- | --- | --- |
| 1.15 | 2.4±0.1 | 0.22±0.02 |
| 2.31 | 4.2±0.1 | 1.07±0.03 |
| 3.46 | 7.8±0.7 | 1.95±0.07 |
| 5.76 | 8.7±0.6 | 2.7±0.1 |

a Experimental conditions: pH 7.0; [Phosphate buffer]= 0.05 M; [H2O2] = (5.0±0.5) *μ*M; λ=320 nm; Temp. = 25.0 oC; Ionic atrength = 0.20 (phosphate buffer).

**Supplementary Material 2**

**1. The Reaction Rate Laws if Ferryl Species Is an Intermediate**

**Path 1:**

k1

**L**FeII + H2O2 _  **L**FeII(H2O2) (1) k-1

k2

**L**FeII(H2O2) _ {**L**FeIV=O}2+ + H2O (2)

k-2

k3

{**L**FeIV=O}2+ + **L**FeII + 2 H+  2 **L**FeIII + H2O, fast (3)

Reaction rate is

(4)

At steady state, apply d[FeIV=O]/dt = 0, we obtain:

(5)

At equilibrium, apply [**L**FeII(H2O2)]/[**L**FeII][H2O2] = k1/k-1, and combine (4) and (5), the reaction rate is:

(6)

Under the condition that k-1k-2 « k-1k3[**L**FeII][H+]2, equation (6) becomes:

(7)

**Path 2**

k4

**L**FeIII + H2O2 _  **L**FeIII(H2O2) (8)

k-4

k5

**L**FeIII(H2O2) _  **L**FeV=O + H2O (9)

k-5

k6

**L**FeV=O + H2O2   **L**FeIII + O2 + H2O (10)

If the absorbance increase at 320 nm is monitored, i.e., formation of **L**FeIII(H2O2) is followed, the reaction rate is:

(11)

At steady state, apply d[**L**FeV=O] = 0, we obtain,

(12)

Combine equations (11) and (12), and apply conditions that k-4 « k4 and k6 [H2O2] « k-5, we obtain,

(13)

Since the oxidation of the iron(II) to iron(III) complex is irreversible, the iron(III) complex concentration is equal to the initial iron(II) complex concentration, therefore, equation (13) can be written as,

(14)

**2. Rate Laws if Hydroxyl Radical Is an Intermediate**

**Path 1**

k1'

**L**FeII + H2O2 _  **L**FeII(H2O2) (15)

k-1

k2

**L**FeII(H2O2)  **L**FeIII + HO - + HO (16)

k3

HO + **L**FeII   **L**FeIII + HO - (17)

Reaction rate is:

(18)

Using steady-state, d[HO]/dt = 0 and d[**L**FeII(H2O2)]/dt = 0, we obtain:

(19)

(20)

Combine equations (18), (19) and (20), we obtain:

(21)

**Path 2**

k4'

**L**FeIII + H2O2 _ **L**FeIII(H2O2) (22)

k-4'

k5'

**L**FeIII(H2O2)  LFeII + H+ + HO2  (23)

k6'

**L**FeII + H2O2   **L**FeIII + OH- +HO (24)

k7'

H2O2 + HO  H2O + HO2 (25)

k8'

HO2 + **L**FeIII  O2 + **L**FeII + H+ (26)

k9'

HO2 + **L**FeII  HO2- + **L**FeIII (27)

Reaction rate for the formation of **L**FeIII(H2O2) is:

(28)

Assume that k4' » (k-4' + k5'), equation (29) results,

(29)
